# Supplementary material
Source: MDPI journal article supplement (https://www.mdpi.com/2073-4441/15/9/1726)
Supplement: s1 [file s1]

# SUPPLEMENTARY MATERIAL

J.M. Obón<sup>\*</sup>, J.A. Fernández-López, M. Alacid, J.M. Angosto

Departamento de Ingeniería Química y Ambiental.  
Universidad Politécnica de Cartagena. Spain

**\*Corresponding author e-mail:** josemaria.obon@upct.es (José María Obón)

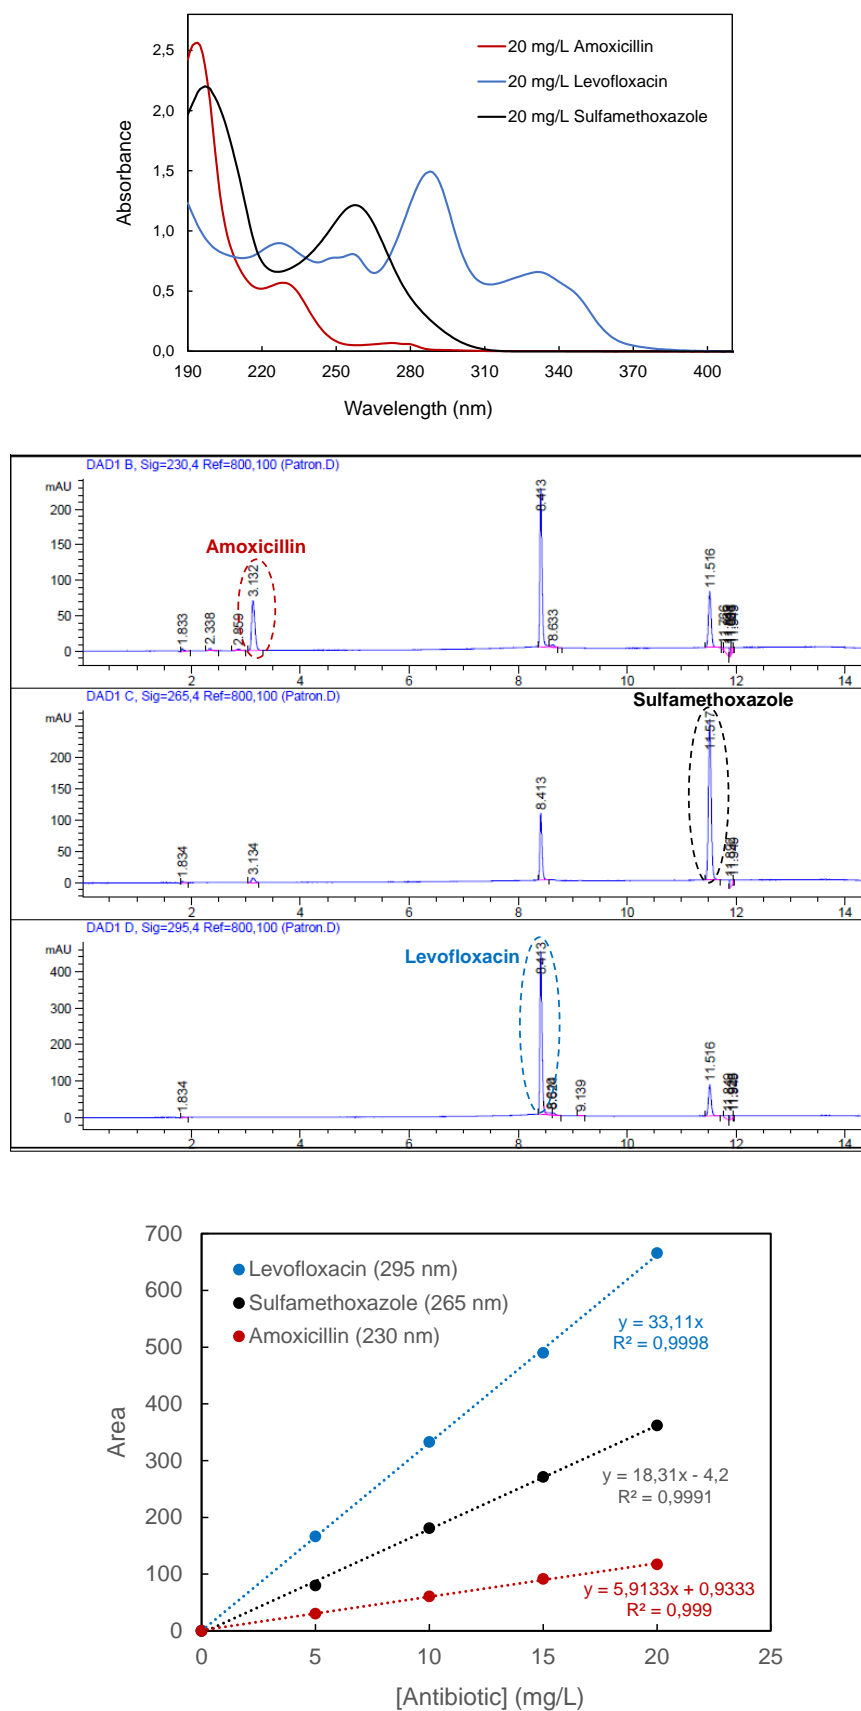

**Figure S1.** Spectra of antibiotics, a typical HPLC chromatogram, and HPLC quantification curves

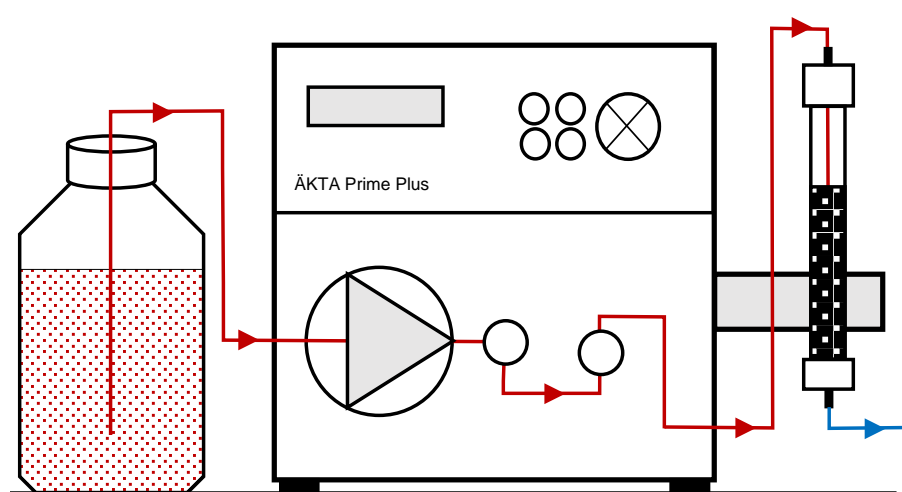

**Figure S2.** Experimental set-up of the studied fixed bed adsorber

**Table S1.** Antibiotic properties.

| Property                                               | Amoxicillin                                                                        | Levofloxacin                                                                        | Sulfamethoxazole                                                                     |
|--------------------------------------------------------|------------------------------------------------------------------------------------|-------------------------------------------------------------------------------------|--------------------------------------------------------------------------------------|
| Chemical structure                                     | 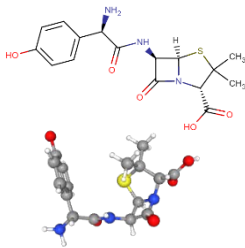 |  |  |
| Molecular formula                                      | $C_{16}H_{19}N_3O_5S$                                                              | $C_{18}H_{20}FN_3O_4$                                                               | $C_{10}H_{11}N_3O_3S$                                                                |
| M (g/mol)                                              | 365.4                                                                              | 361.4                                                                               | 253.3                                                                                |
| Polar surface area ( $\text{\AA}^2$ )                  | 132.9                                                                              | 73.3                                                                                | 107                                                                                  |
| Melting point ( $^{\circ}\text{C}$ )                   | 194                                                                                | 220-225                                                                             | 166-169                                                                              |
| Water solubility (mg/L)                                | 3430                                                                               | 1000                                                                                | 459                                                                                  |
| pKa <sub>1</sub> / pKa <sub>2</sub> / pKa <sub>3</sub> | 2.4 / 7.4 / 9.6<br>(carboxyl, amine, phenol)                                       | 6.1 / 8.1<br>(carboxyl, piperazine amine)                                           | 1.8 / 5.6<br>(amine, sulphonamide)                                                   |

[DrugBank Online | Database for Drug and Drug Target Info](#) (Drugbank online)

[PubChem \(nih.gov\)](#) (Pubchem)

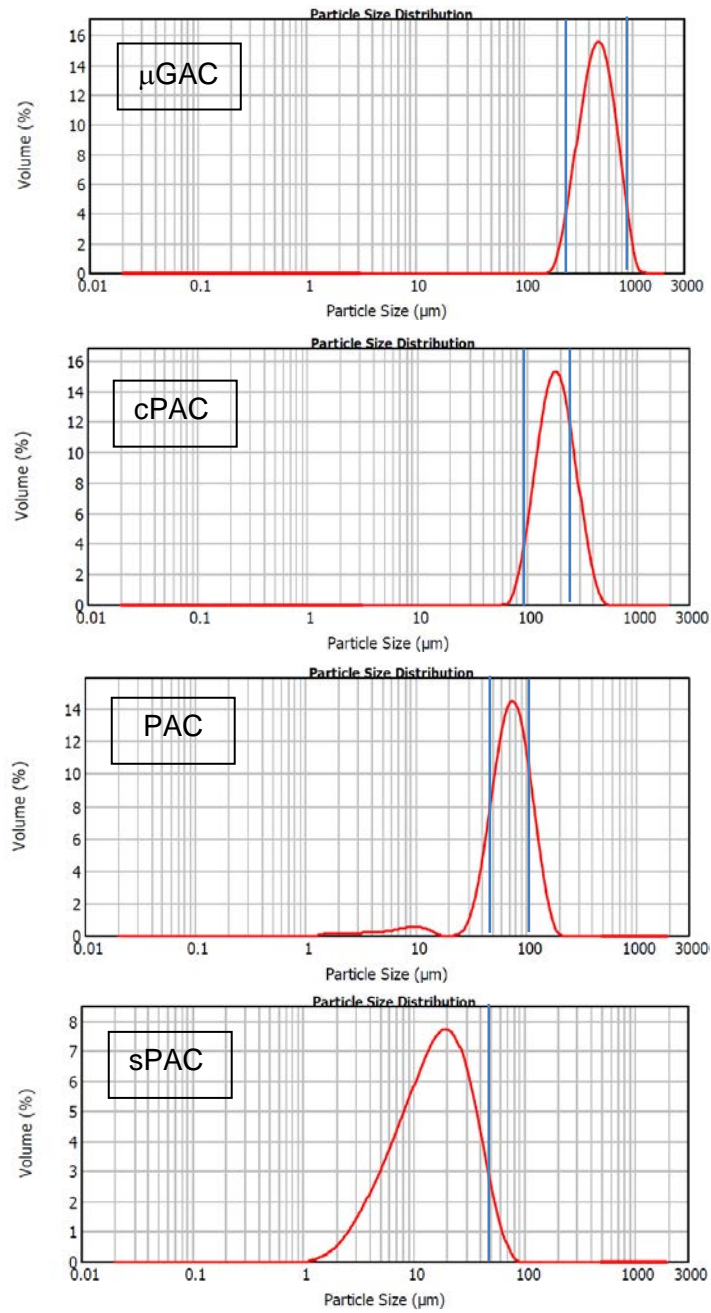

**Figure S3.** Particle size distribution curves of studied activated carbons.

**Table S2.** Parameters of particle size distributions of studied activated carbons.

| Parameter   | GAC  | μGAC  | cPAC  | PAC   | sPAC  |
|-------------|------|-------|-------|-------|-------|
| D[4,3] (μm) | 1500 | 508   | 197   | 77    | 19    |
| Span        | -    | 0.976 | 1.019 | 1.089 | 2.103 |
| Uniformity  | -    | 0.300 | 0.317 | 0.350 | 0.654 |

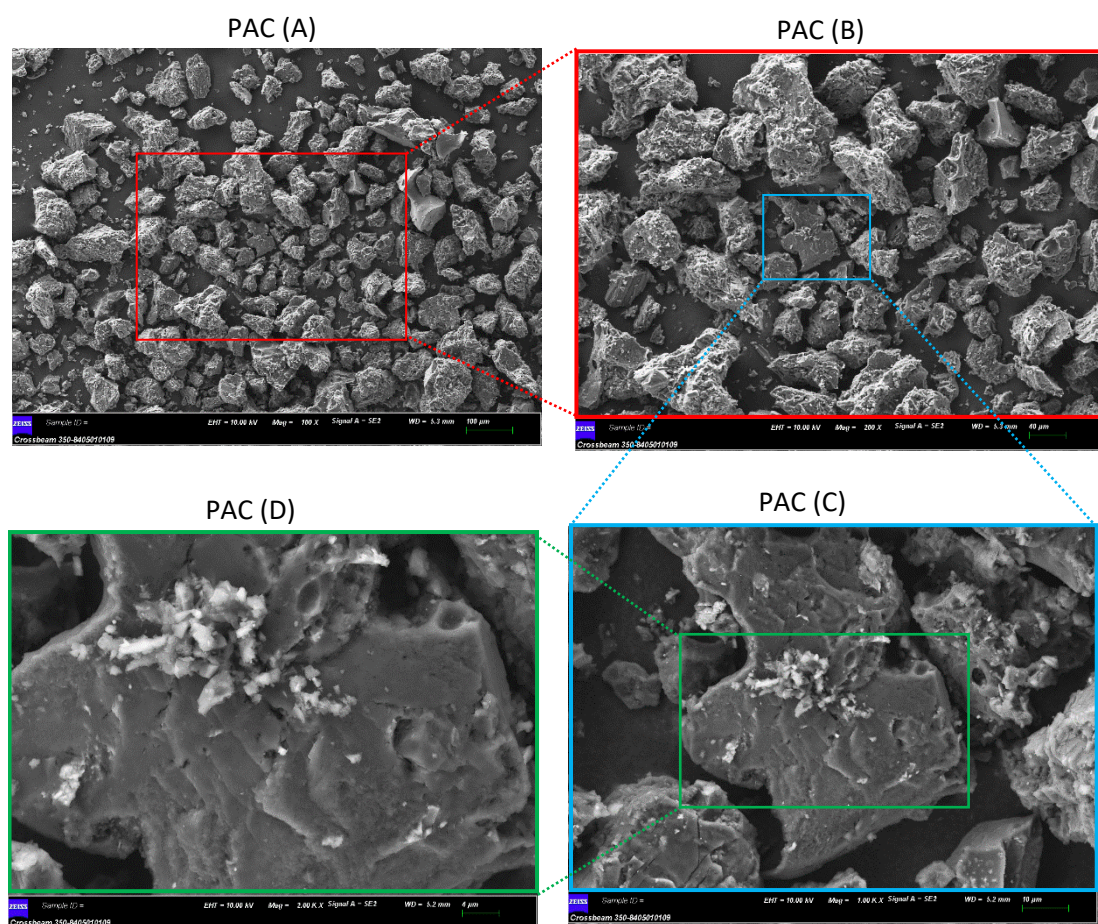

**Figure S4.** SEM images of PAC using different magnifications 100, 200, 1000 and 2000 (A, B, C, D).

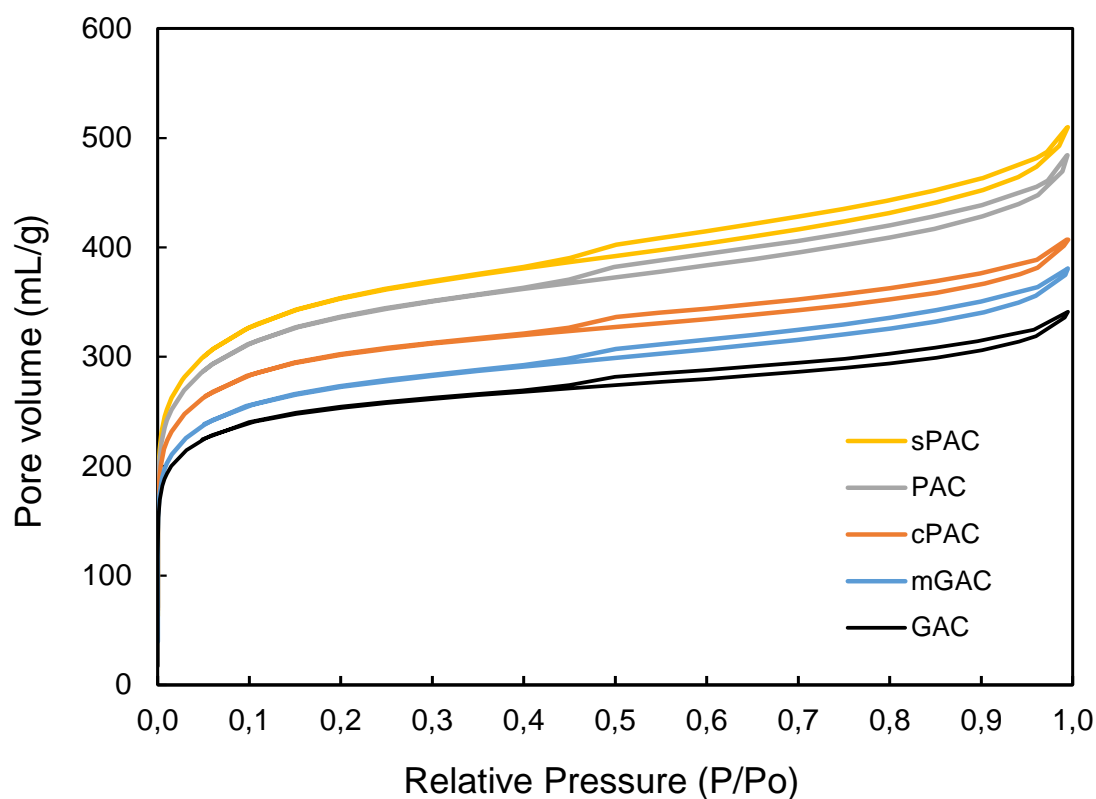

**Figure S5.** Adsorption-desorption isotherms of N<sub>2</sub> at 77 K

**Table S3.** Specific surface area and pore volumes of obtained activated carbons.

| Parameter                               | GAC   | $\mu$ GAC | cPAC  | PAC   | sPAC  |
|-----------------------------------------|-------|-----------|-------|-------|-------|
| $S_{\text{BET}}$ (m <sup>2</sup> /g)    | 942   | 1014      | 1125  | 1245  | 1318  |
| $V_{\text{total}}$ (cm <sup>3</sup> /g) | 0.492 | 0.550     | 0.590 | 0.693 | 0.733 |
| $V_{\text{micro}}$ (cm <sup>3</sup> /g) | 0.353 | 0.375     | 0.410 | 0.444 | 0.468 |
| $V_{\text{meso}}$ (cm <sup>3</sup> /g)  | 0.139 | 0.175     | 0.180 | 0.249 | 0.265 |

$S_{\text{BET}}$  (m<sup>2</sup>/g) = BET surface area

$V_{\text{micro}}$  (cm<sup>3</sup>/g) = micropore volume (DR)

$V_{\text{total}}$  (cm<sup>3</sup>/g) = total pore volume

$V_{\text{meso}}$  (cm<sup>3</sup>/g) = mesopore volume =  $V_{\text{total}} - V_{\text{micro}}$

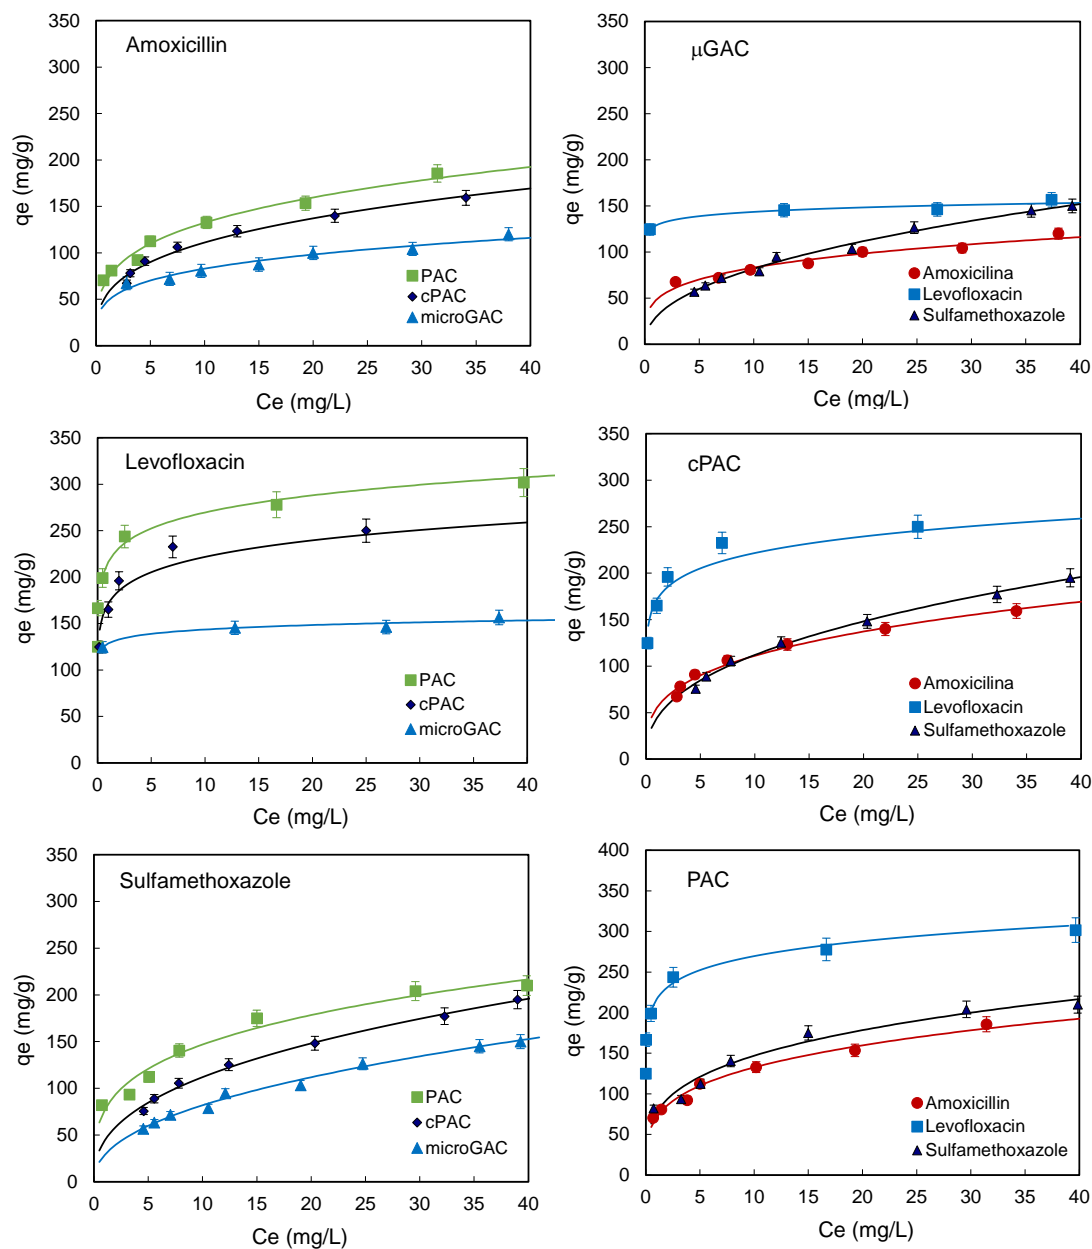

**Figure S6.** Isothermal adsorption of individual antibiotics on  $\mu$ GAC, cPAC, and PAC, fitted with Freundlich model.



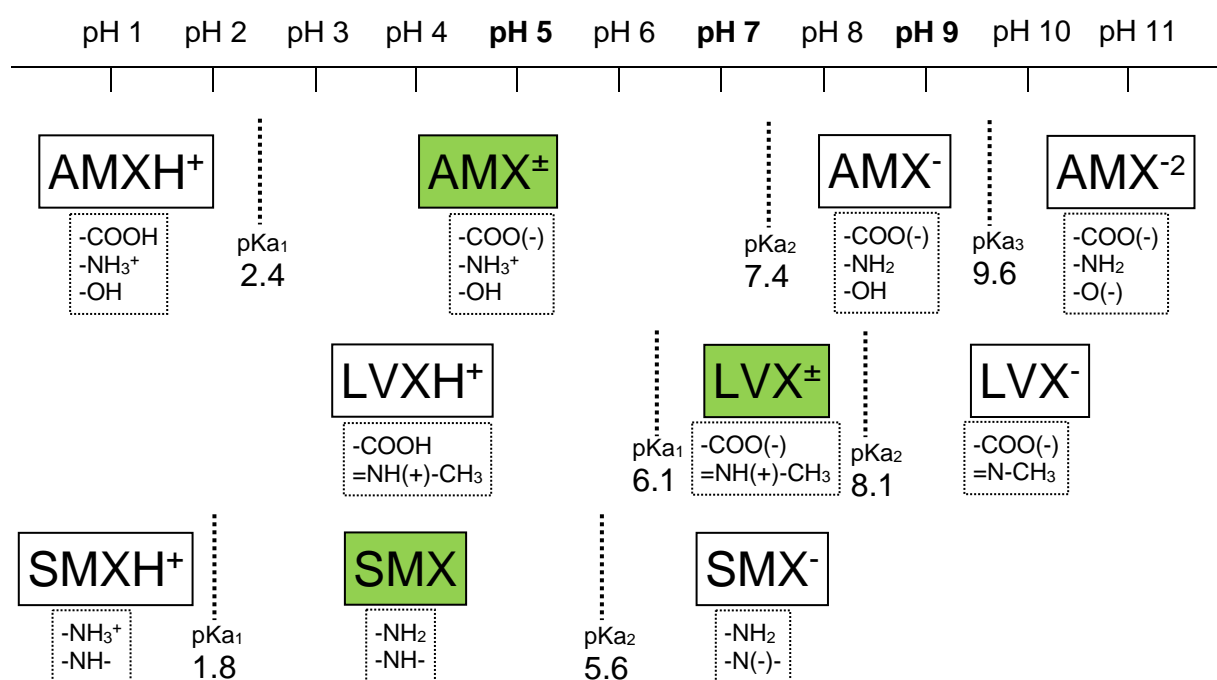

**Figure S7.** Distribution of molecular species at different pHs of amoxicillin (AMX), levofloxacin (LVX), and sulfamethoxazole (SMX). Green are structures at the pH of best adsorption.

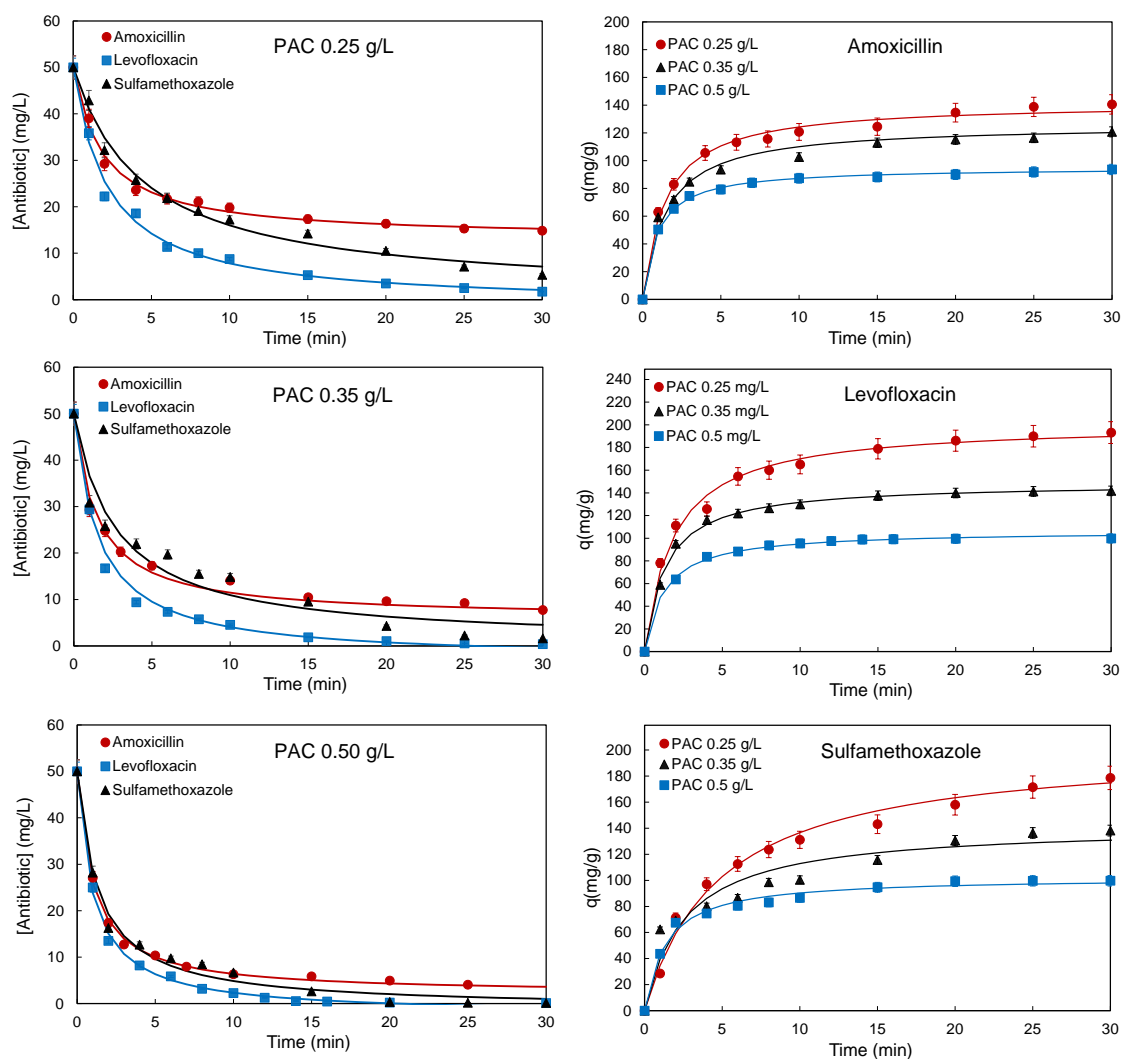

**Figure S8.** Antibiotics adsorption kinetics at pH 7 with different PAC concentrations, fitted with second-order kinetic model.

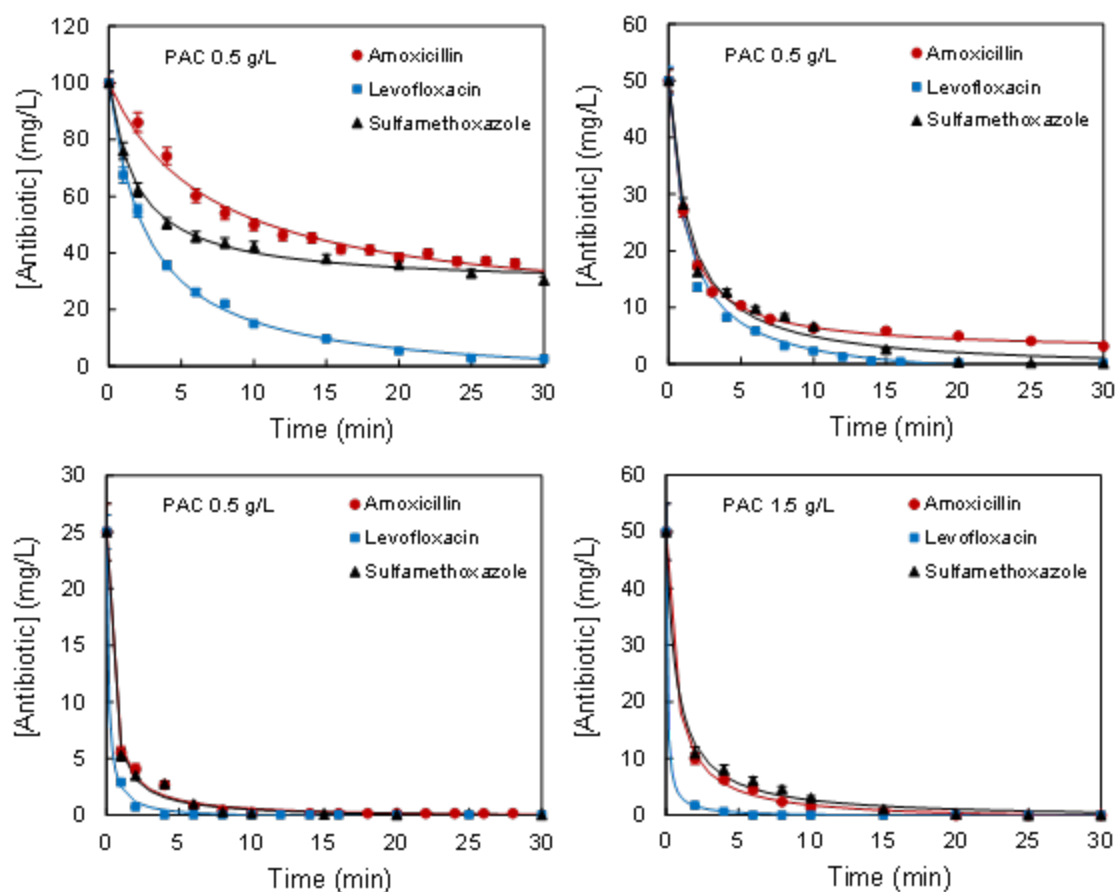

**Figure S9.** Adsorption kinetics at pH 7 with different individual antibiotic concentrations using 0.5 g/L PAC, and an antibiotic's mixture with 1.5 g/L PAC concentration. Data fitted with pseudo-second order model.

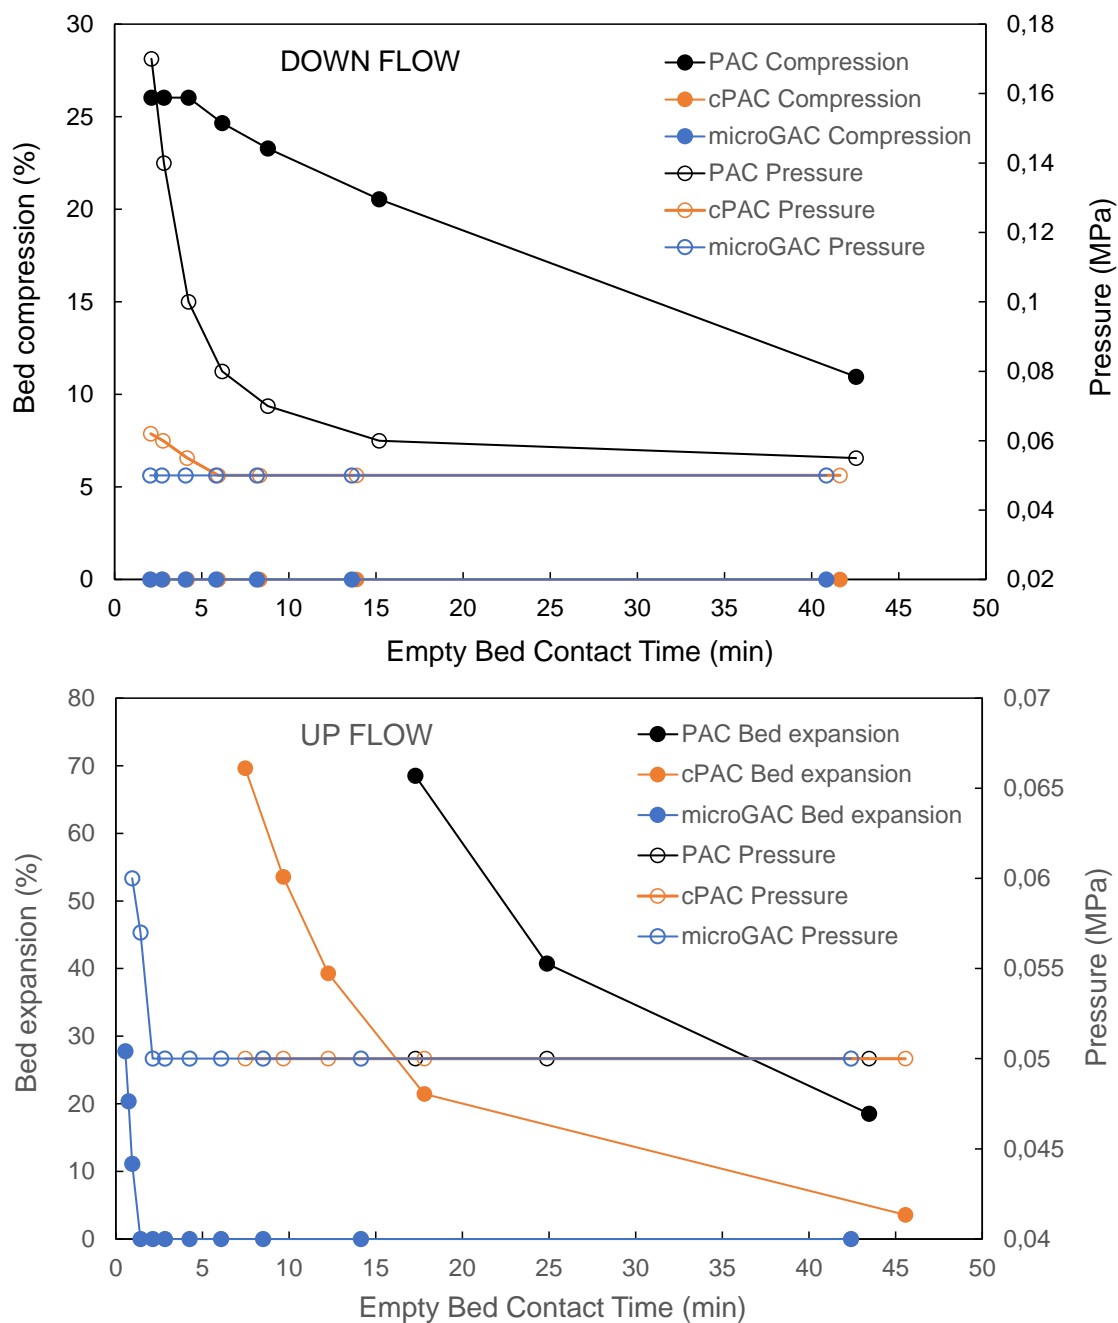

**Figure S10.** Evaluation of operation conditions of fixed bed adsorbers packed with different activated carbons:  $\mu$ GAC, cPAC and PAC.

**Table S4.** Wastewater analysis

| Analytical parameter                                                 | Value |
|----------------------------------------------------------------------|-------|
| pH                                                                   | 7.0   |
| Conductivity ( $\mu\text{S}/\text{cm}$ )                             | 120.0 |
| BOD <sub>5</sub> ( $\text{mgO}_2/\text{L}$ )                         | 10    |
| Turbidity (NTU)                                                      | 1     |
| Cl <sup>-</sup> ( $\text{mg}/\text{L}$ )                             | 44.24 |
| Br <sup>-</sup> ( $\text{mg}/\text{L}$ )                             | 0.67  |
| F <sup>-</sup> ( $\text{mg}/\text{L}$ )                              | 0.14  |
| NO <sub>3</sub> <sup>-</sup> ( $\text{mg}/\text{L}$ )                | 14.29 |
| NO <sub>2</sub> <sup>-</sup> ( $\text{mg}/\text{L}$ )                | 2.61  |
| PO <sub>4</sub> <sup>3-</sup> ( $\text{mg}/\text{L}$ )               | 4.04  |
| SO <sub>4</sub> <sup>2-</sup> ( $\text{mg}/\text{L}$ )               | 34.28 |
| C <sub>2</sub> O <sub>4</sub> <sup>2-</sup> ( $\text{mg}/\text{L}$ ) | <LD   |
| Na <sup>+</sup> ( $\text{mg}/\text{L}$ )                             | 28.29 |
| K <sup>+</sup> ( $\text{mg}/\text{L}$ )                              | 5.78  |
| Li <sup>+</sup> ( $\text{mg}/\text{L}$ )                             | <LD   |
| Ca <sup>2+</sup> ( $\text{mg}/\text{L}$ )                            | 36.76 |
| Mg <sup>2+</sup> ( $\text{mg}/\text{L}$ )                            | 6.81  |
| NH <sub>4</sub> <sup>+</sup> ( $\text{mg}/\text{L}$ )                | 1.23  |
| Total Inorganic Carbon ( $\text{mg}/\text{L}$ )                      | 12.22 |
| Total Organic Carbon ( $\text{mg}/\text{L}$ )                        | 4.79  |
| Total Carbon ( $\text{mg}/\text{L}$ )                                | 16.67 |
| Total Nitrogen ( $\text{mg}/\text{L}$ )                              | 5.68  |

**Table S5.** Modelling breakthrough curves of fixed bed adsorbers packed with  $\mu$ GAC or cPAC using deionized water with 50 mg/L antibiotic concentrations as influent.

| Activated carbon | Model                         | Model parameter                    | Antibiotic  |              |                  |
|------------------|-------------------------------|------------------------------------|-------------|--------------|------------------|
|                  |                               |                                    | Amoxicillin | Levofloxacin | Sulfamethoxazole |
| $\mu$ GAC        | Bohart-Adams                  | $K_{BA}$ (cm <sup>3</sup> /mg min) | 0.0406      | 0.0382       | 0.0260           |
|                  |                               | $q_m$ (mg/cm <sup>3</sup> )        | 29.63       | 43.87        | 29.10            |
|                  |                               | $R^2$                              | 0.9844      | 0.9926       | 0.9917           |
|                  | Thomas                        | $K_T$ (cm <sup>3</sup> /mg min)    | 0.0406      | 0.0382       | 0.0260           |
|                  |                               | $q_0$ (mg/g)                       | 62.83       | 93.02        | 61.71            |
|                  |                               | $R^2$                              | 0.9844      | 0.9926       | 0.9917           |
|                  | Yoon-Nelson                   | $K_{YN}$ (h <sup>-1</sup> )        | 0.1217      | 0.1145       | 0.0781           |
|                  |                               | $\tau$ (h)                         | 42          | 62           | 41               |
|                  |                               | $R^2$                              | 0.9844      | 0.9926       | 0.9917           |
|                  | Yan or modified dose-response | $\alpha'$ (-)                      | 5.08        | 7.92         | 3.37             |
|                  |                               | $q_F$ (mg/g)                       | 58.40       | 91.41        | 57.03            |
|                  |                               | $R^2$                              | 0.9742      | 0.9840       | 0.9775           |
| cPAC             | Bohart-Adams                  | $K_{BA}$ (cm <sup>3</sup> /mg min) | 0.0258      | 0.0458       | 0.0345           |
|                  |                               | $q_m$ (mg/cm <sup>3</sup> )        | 60.22       | 93.94        | 84.09            |
|                  |                               | $R^2$                              | 0.9854      | 0.9663       | 0.9883           |
|                  | Thomas                        | $K_T$ (cm <sup>3</sup> /mg min)    | 0.0258      | 0.0458       | 0.0345           |
|                  |                               | $q_0$ (mg/g)                       | 127.70      | 199.20       | 178.31           |
|                  |                               | $R^2$                              | 0.9854      | 0.9663       | 0.9883           |
|                  | Yoon-Nelson                   | $K_{YN}$ (h <sup>-1</sup> )        | 0.0775      | 0.1373       | 0.1036           |
|                  |                               | $\tau$ (h)                         | 85          | 133          | 119              |
|                  |                               | $R^2$                              | 0.9854      | 0.9663       | 0.9883           |
|                  | Yan or modified dose-response | $\alpha'$ (-)                      | 8.15        | 21.13        | 11.90            |
|                  |                               | $q_F$ (mg/g)                       | 126.70      | 189.12       | 173.58           |
|                  |                               | $R^2$                              | 0.9826      | 0.9816       | 0.9980           |

**Table S6.** Modelling breakthrough curves of fixed bed adsorbers packed with cPAC using as influent wastewater with 50 mg/L antibiotic concentrations.

| Model                         | Model parameter                    | Wastewater |        |        |           | Deionized water |
|-------------------------------|------------------------------------|------------|--------|--------|-----------|-----------------|
|                               |                                    | AMX        | LVX    | SMX    | Total Ant | Total Ant       |
| Bohart-Adams                  | $K_{BA}$ (cm <sup>3</sup> /mg min) | 0.0362     | 0.031  | 0.0262 | 0.0083    | 0.0077          |
|                               | $q_m$ (mg/cm <sup>3</sup> )        | 76.55      | 88.07  | 63.61  | 230.50    | 232.84          |
|                               | $R^2$                              | 0.9874     | 0.9757 | 0.9839 | 0.9791    | 0.9807          |
| Thomas                        | $K_T$ (cm <sup>3</sup> /mg min)    | 0.0362     | 0.031  | 0.0262 | 0.0083    | 0.0077          |
|                               | $q_0$ (mg/g)                       | 162.33     | 186.75 | 134.90 | 488.85    | 493.75          |
|                               | $R^2$                              | 0.9874     | 0.9757 | 0.9839 | 0.9791    | 0.9807          |
| Yoon-Nelson                   | $K_{YN}$ (h <sup>-1</sup> )        | 0.1086     | 0.0942 | 0.0786 | 0.0750    | 0.0694          |
|                               | $\tau$ (h)                         | 108        | 124    | 89     | 109       | 110             |
|                               | $R^2$                              | 0.9874     | 0.9757 | 0.9839 | 0.9791    | 0.9807          |
| Yan or modified dose-response | $\alpha'$ (-)                      | 11.27      | 9.94   | 8.76   | 7.86      | 6.94            |
|                               | $q_F$ (mg/g)                       | 157.84     | 184.98 | 134.79 | 472.88    | 481.75          |
|                               | $R^2$                              | 0.9677     | 0.9619 | 0.9767 | 0.9818    | 0.9621          |

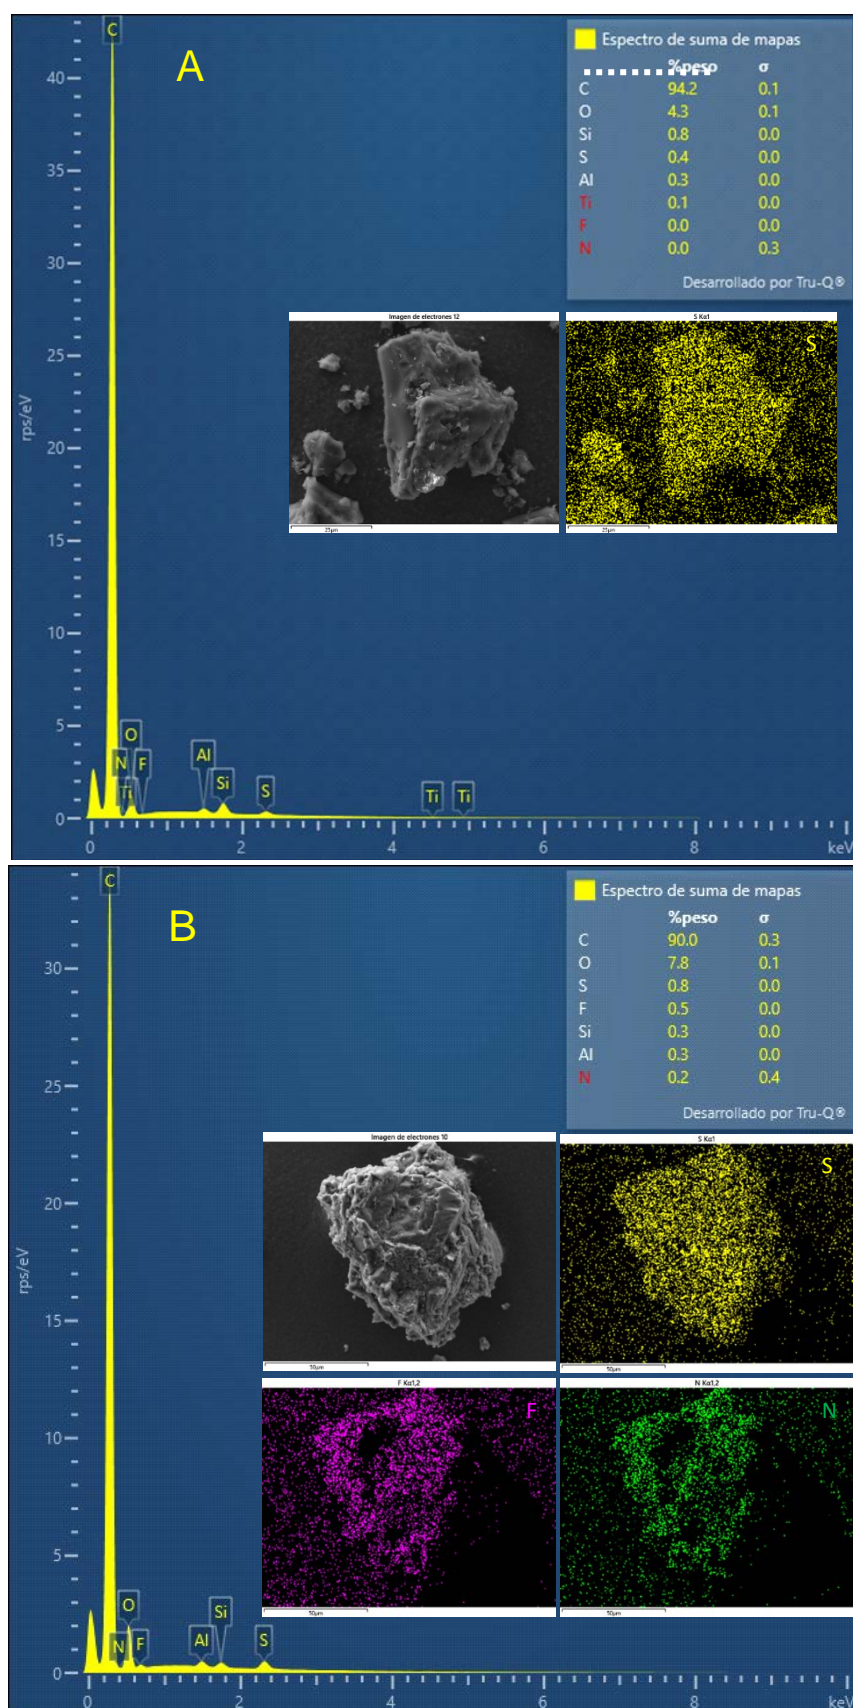

**Figure S11.** Elemental analyses of a PAC particle determined by energy dispersive X-ray spectroscopy, before (A) and after (B) amoxicillin, levofloxacin, and sulfamethoxazole full adsorption.
